# Supplementary material for: Short and Long-Term Effects of the Exposure of Breast Cancer Cell Lines to Different Ratios of Free or Co-Encapsulated Liposomal Paclitaxel and Doxorubicin
Source: PubMed Central journal article supplement (PMC6523953; doi:10.3390/pharmaceutics11040178), 2019-04-11
Supplement: pharmaceutics-11-00178-s001.pdf [file pharmaceutics-11-00178-s001.pdf]

# Supplementary Materials: Short and Long-Term Effects of the Exposure of Breast Cancer Cell Lines to Different Ratios of Free or Co-Encapsulated Liposomal Paclitaxel and Doxorubicin

Marina Santiago Franco, Marjorie Coimbra Roque and Mônica Cristina Oliveira

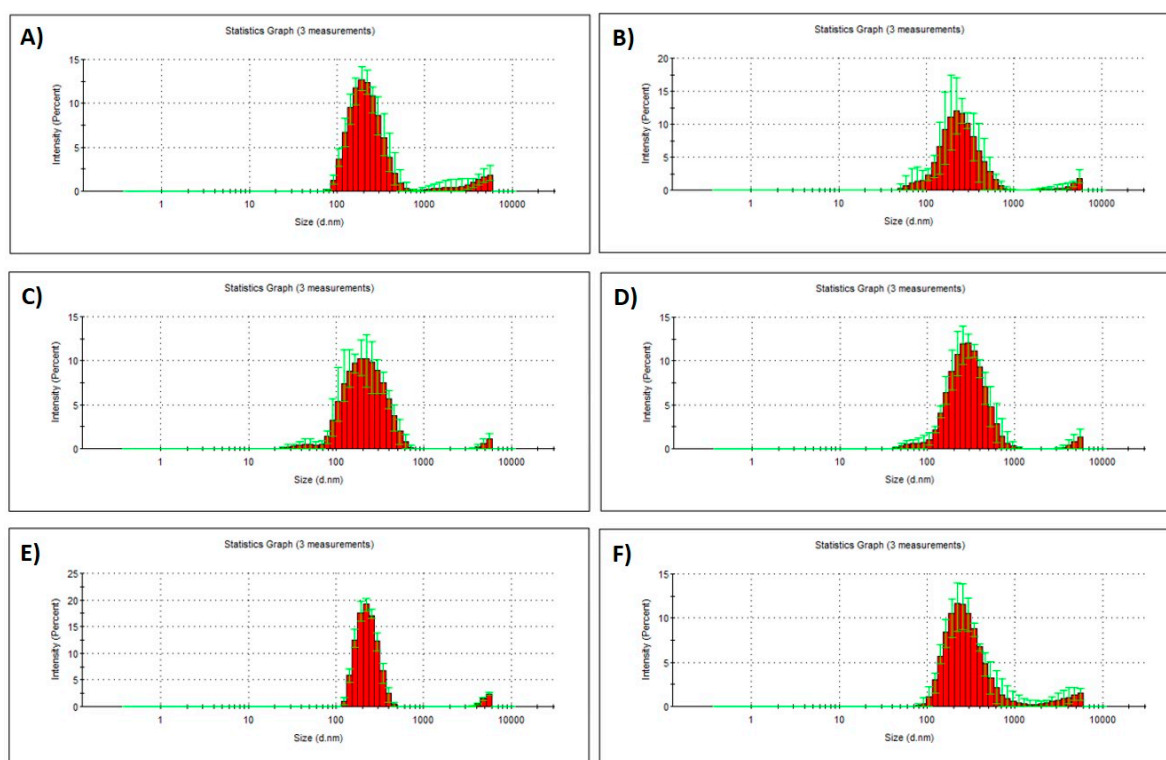

**Figure S1.** Intensity particle size distribution for LCFL-Blank (A), LCFL-PTX (B), LCFL-DXR (C), LCFL-PTX/DXR 10:1 (D), LCFL-PTX/DXR 1:1 (E), LCFL-PTX/DXR 1:10 (F). Ratio refers to PTX:DXR molar ratio. Abbreviations: DXR, doxorubicin; PTX, paclitaxel; LCFL, long-circulating and fusogenic liposomes; LCFL-PTX/DXR, long-circulating and fusogenic liposomes co-encapsulating paclitaxel and doxorubicin.

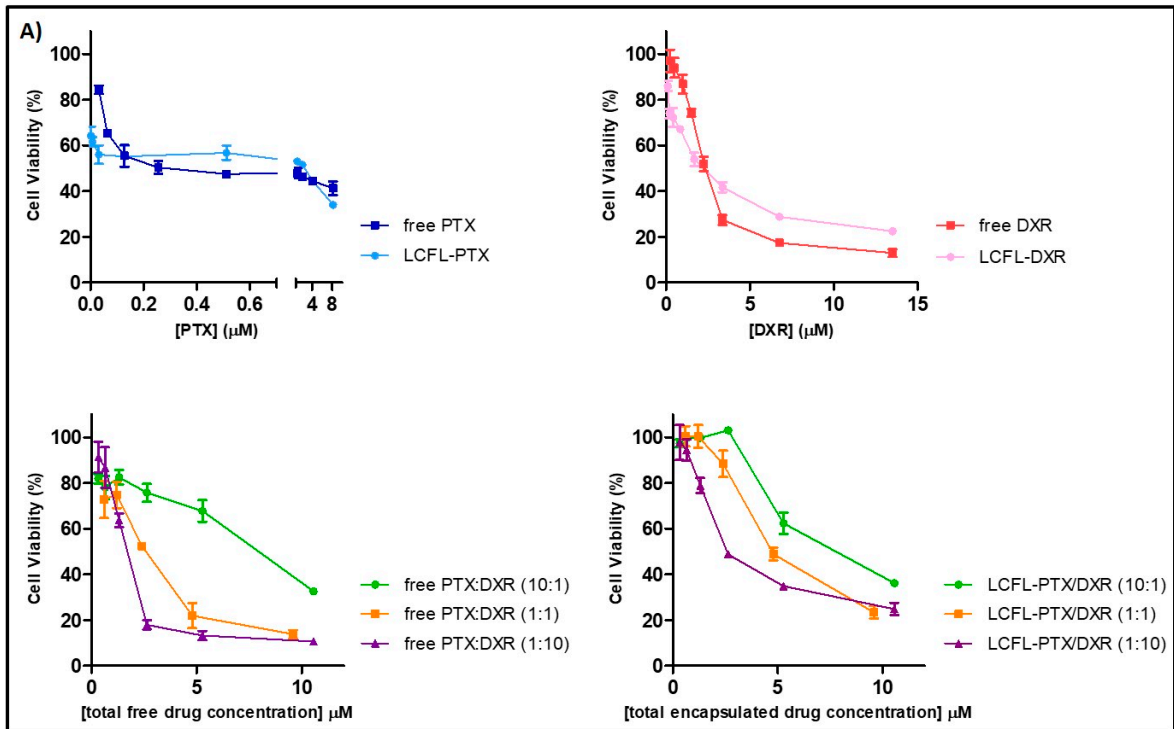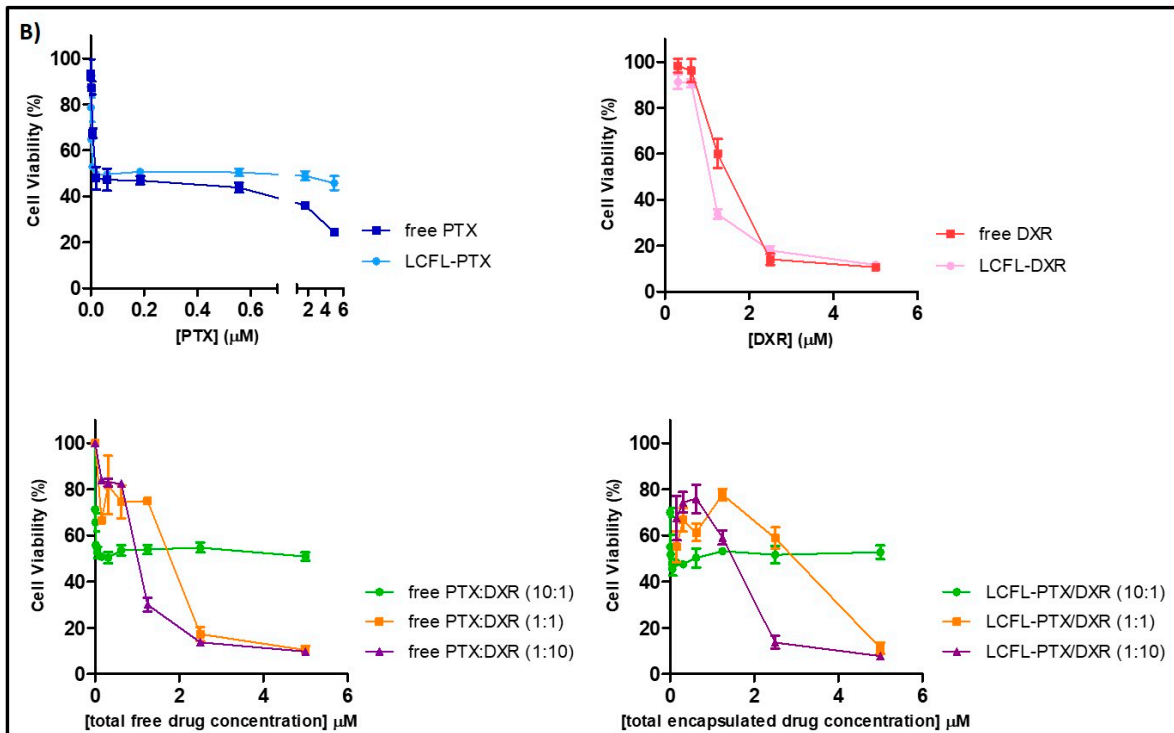

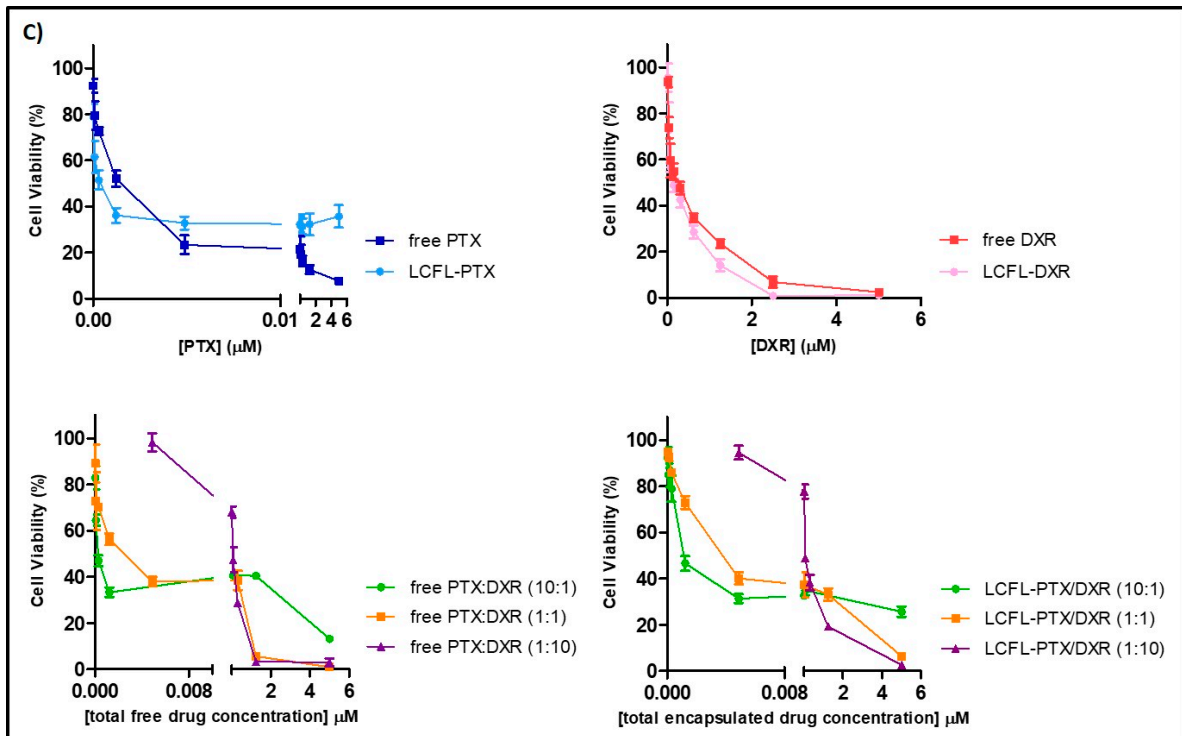

**Figure S2.** Cell viability curves for MDA-MB-231 (panel A); MCF-7 (panel B) and SKBR-3 (panel C) cell lines when exposed to different ratios of free or liposome co-encapsulated PTX and DXR for 48 h.
